# Supplementary material for: Re-emergence of the leaf clip gesture during an alpha takeover affects variation in male chimpanzee loud calls
Source: PeerJ. 2018 Jun 28;6:e5079. doi: 10.7717/peerj.5079 (PMC6026532; doi:10.7717/peerj.5079)
Supplement: Data S1 [file peerj-06-5079-s004.xlsx]

## Sheet: panthootdata
month	year	chimp.caller	behav	lc.yn	complete.nc	total.dur	intro.num.element	intro.dur	intro.lastcall.F0	intro.lastcall.duration	intro.lastcall.pF	bu.num.voiced.ele	bu.dur	bu.middlecall.F0	bu.middlecall.dur	bu.middlecall.pF	cx.num.ele	cx.dur	cx.highestcall.F0	cx.highestcall.dur	cx.highestcall.pF	dr.dur	dr.num.beats
7	2011	kub	dp	n	nc	7.51	2	1.03	230	0.29	230	9	4.97	267	0.12	267	7	1.55	NA	NA	NA	1.55	7
7	2011	uta	dp	n	c	7.34	2	1.01	255	0.178	255	14	4.26	300	0.143	300	8	1.727	1805	0.322	1805	0.882	6
7	2011	woo	mg	n	c	3.303	0	0	NA	NA	NA	0	0	NA	NA	NA	12	3.303	NA	NA	NA	3.303	12
8	2011	woo	mg	n	nc	9.371	4	2.006	230	0.266	230	12	3.523	261	0.135	261	11	3.422	1563	0.532	1563	8	1.152
8	2011	woo	dp	n	nc	5.59	1	0.487	227	0.241	227	14	3.966	266	0.148	266	5	0.872	1537	0.087	1537	0.24	3
8	2011	uta	dp	n	nc	8.791	1	0.287	264	0.144	264	12	3.271	304	0.118	304	10	3.563	1290	0.5	1290	7	1.371
8	2011	woo	mg	n	c	3.766	2	1.452	350	0.395	350	4	1.779	283	0.107	283	1	0.428	365	0.428	730	0	0
8	2011	kub	dp	n	nc	5.476	NA	NA	NA	NA	NA	6	2.422	320	0.135	320	13	2.967	1370	0.609	4110	1.89	10
8	2011	kub	dp	n	nc	4.398	NA	NA	NA	NA	NA	10	3.623	298	0.155	298	6	0.737	NA	NA	NA	0.737	6
8	2011	woo	mg	n	c	9.804	2	0.497	330	0.163	330	15	4.687	275	0.169	275	15	4.354	1581	0.542	1581	3.603	11
8	2011	kub	dp	n	nc	4.216	NA	NA	NA	NA	NA	6	2.012	354	0.178	354	2	1.946	1358	0.724	2746	0	0
8	2011	kub	dp	n	nc	9.832	2	1.788	432	0.604	432	11	4.282	309	0.147	309	16	3.844	1514	0.583	1514	2.346	9
8	2011	kub	rp	n	c	7.498	4	1.953	300	0.229	300	15	4.852	287	0.136	287	1	0.61	660	0.61	3329	0	0
8	2011	woo	rp	n	nc	8.253	2	0.474	141	0.107	141	20	5.939	171	0.135	171	10	1.722	880	0.138	880	1.068	6
8	2011	woo	dp	n	nc	8.052	3	1.03	261	0.122	261	15	4.139	265	0.113	265	13	2.764	1396	0.575	1396	2.764	11
8	2011	woo	dp	n	c	13.727	4	3.409	440	0.315	880	19	6.649	261	0.148	261	11	3.556	728	0.537	728	2.453	9
8	2011	woo	mg	n	c	7.969	3	2.126	401	0.419	401	16	4.678	265	0.133	265	2	1.062	840	0.34	1104	0	0
8	2011	woo	mg	n	c	5.628	4	3.409	320	0.534	320	7	2.162	244	0.182	244	NA	NA	NA	NA	NA	0	0
8	2011	kub	dp	n	c	7.071	3	2.206	278	0.14	278	9	4.011	298	0.145	298	5	0.765	NA	NA	NA	0.765	5
8	2011	uta	dp	n	c	6.427	3	2.348	522	0.358	522	10	3.098	276	0.131	276	6	0.979	354	0.125	712	0.979	5
8	2011	uta	dp	n	nc	8.444	2	0.893	779	0.254	779	7	2.878	298	0.132	298	11	4.592	1944	0.571	1944	3.651	9
9	2011	uta	dp	n	c	8.684	2	1.614	365	0.637	365	12	3.903	556	0.179	1138	9	2.921	1014	0.448	1014	1.173	5
9	2011	uta	dp	n	nc	3.462	2	0.938	578	0.239	578	8	2.205	276	0.118	276	3	0.335	NA	NA	NA	0.335	3
9	2011	uta	dp	n	nc	7.347	3	1.874	511	0.569	1026	8	2.811	265	0.119	265	18	2.621	812	0.404	4867	2.621	16
9	2011	uta	dp	n	c	9.001	7	4.889	640	0.249	1305	8	2.559	298	0.146	298	9	1.554	NA	NA	NA	1.554	9
9	2011	uta	rp	n	c	11.678	8	4.613	569	0.464	1140	9	3.03	289	0.129	289	12	3.947	1564	0.479	1564	1.335	9
9	2011	uta	dp	n	c	12.986	7	5.2	634	0.233	1295	10	3.262	285	0.135	285	24	3.973	1312	0.755	1953	3.946	21
9	2011	kub	dp	n	nc	7.17	1	0.135	477	0.135	477	7	2.395	365	0.164	365	9	4.6	1370	0.552	2690	1.498	6
9	2011	kub	dp	n	c	10.773	5	4.309	502	0.338	2039	9	3	340	0.141	340	15	3.601	1599	0.866	1599	3.601	12
10	2011	kub	rp	n	c	2.665	6	2.665	326	0.117	326	NA	NA	NA	NA	NA	NA	NA	NA	NA	NA	0	0
10	2011	kub	dp	n	nc	4.76	2	1.276	441	0.15	885	7	3.024	338	0.162	338	3	0.424	NA	NA	NA	0.424	3
10	2011	kub	dp	n	nc	3.952	NA	NA	NA	NA	NA	11	2.032	204	0.113	204	2	1.81	1354	0.609	1354	0.534	5
10	2011	kub	rp	n	nc	4.404	2	0.853	401	0.159	401	11	3.314	314	0.124	314	2	0.16	NA	NA	NA	0.16	2
10	2011	kub	dp	n	nc	7.17	1	0.84	476	0.26	476	17	3.758	365	0.123	365	1	0.595	1193	0.595	1193	1.072	6
10	2011	woo	mg	n	nc	8.356	1	0.532	308	0.343	308	20	5.408	210	0.127	210	7	2.326	1045	0.418	1045	0.997	4
10	2011	jac	mg	n	c	9.914	10	3.962	328	0.321	328	8	3.391	331	0.185	331	3	2.037	1763	0.453	1763	0	0
10	2011	kub	dp	n	nc	6.406	2	1.506	390	0.186	390	8	4.411	349	0.157	349	3	0.434	NA	NA	NA	0.434	3
10	2011	kub	rp	y	c	11.361	4	2.964	528	0.345	1054	16	3.99	343	0.152	343	19	4.442	1265	0.147	2720	4.173	13
10	2011	kub	dp	n	nc	7.455	NA	NA	NA	NA	NA	12	3.599	359	0.168	359	6	3.152	1489	0.311	1489	0.044	1
10	2011	kub	dp	n	nc	7.259	2	1.664	321	0.701	321	8	3.578	354	0.193	354	9	1.866	1604	0.539	1604	1.866	6
10	2011	kub	dp	n	nc	5.297	NA	NA	NA	NA	NA	8	3.9	355	0.157	355	6	1.322	1488	0.793	1488	0.678	4
10	2011	jac	mg	n	c	5.589	1	0.268	366	0.268	366	14	5.232	308	0.188	308	NA	NA	NA	NA	NA	0	0
10	2011	uta	dp	n	c	4.015	1	0.663	355	0.663	355	1	2.01	465	0.626	930	2	1.245	365	0.482	1110	0	0
10	2011	uta	dp	n	c	11.747	7	2.317	343	0.0633	343	9	9.43	515	0.746	1030	NA	NA	NA	NA	NA	0	0
10	2011	kub	dp	n	c	5.92	2	1.072	355	0.194	355	6	2.894	630	0.259	630	3	2.319	1400	0.482	2800	0	0
10	2011	kub	dp	n	nc	3.664	1	0.223	343	0.232	343	3	1.127	340	0.187	340	3	2.156	1050	0.652	2088	0	0
10	2011	uta	dp	n	c	6.692	6	2.97	574	0.217	574	6	1.92	280	0.105	280	2	1.571	1060	0.694	2120	0	0
10	2011	kub	rp	n	c	4.155	4	4.155	458	0.6	458	NA	NA	NA	NA	NA	NA	NA	NA	NA	NA	0	0
10	2011	rom	mg	n	c	3.266	3	3.266	302	0.236	302	NA	NA	NA	NA	NA	NA	NA	NA	NA	NA	0	0
10	2011	kub	rp	y	c	10.9	6	6.748	342	0.62	342	0	0	NA	NA	NA	3	0.544	NA	NA	NA	0.544	3
10	2011	kub	rp	y	nc	7.439	6	7.439	310	0.688	310	NA	NA	NA	NA	NA	NA	NA	NA	NA	NA	0	0
10	2011	kub	rp	y	c	8.15	6	4.99	365	0.66	365	5	1.95	387	0.069	387	4	0.53	NA	NA	NA	0.53	4
10	2011	kub	rp	y	c	8.847	3	3.229	430	0.928	860	6	2.856	317	0.095	317	9	2.859	NA	NA	NA	2.859	9
10	2011	kub	rp	y	c	7.315	5	3.494	447	0.27	903	9	3.011	297	0.094	297	4	0.973	NA	NA	NA	0.973	4
10	2011	kub	dp	n	nc	4.52	3	2.517	320	0.419	320	3	1.14	327	0.23	327	1	0.319	486	0.319	972	0	0
10	2011	woo	mg	n	nc	12.29	3	2.694	204	0.316	204	11	4.458	366	0.103	366	3	1.829	967	0.266	967	0	0
10	2011	kub	dp	n	nc	2.383	NA	NA	NA	NA	NA	NA	NA	NA	NA	NA	3	2.383	1464	0.571	4400	0	0
10	2011	uta	mg	n	nc	3.144	NA	NA	NA	NA	NA	4	1.512	308	0.112	308	5	1.629	455	0.658	455	0.508	4
10	2011	uta	dp	n	c	15.387	20	15.387	516	0.586	516	NA	NA	NA	NA	NA	NA	NA	NA	NA	NA	0	0
10	2011	uta	dp	n	c	14.041	3	2.436	453	0.417	453	18	10.447	557	0.184	557	1	0.704	538	0.704	1079	0	0
10	2011	uta	dp	n	c	7.174	2	1.903	374	0.575	374	5	4.251	378	0.417	378	1	0.985	522	0.985	522	0	0
10	2011	woo	mg	n	c	7.116	3	2.452	314	0.384	314	10	4.085	205	0.134	205	1	0.299	748	0.299	748	0	0
10	2011	woo	dp	y	nc	4.158	NA	NA	NA	NA	NA	11	2.971	268	0.157	268	4	1.206	672	0.461	672	0.667	3
10	2011	woo	dp	n	nc	6.509	3	2.108	320	0.251	320	14	3.907	233	0.118	233	3	0.435	NA	NA	NA	0.435	3
10	2011	kub	dp	n	c	8.437	3	2.534	320	0.987	320	3	3.54	447	0.731	447	5	0.788	NA	NA	NA	0.788	5
10	2011	rom	dp	n	nc	4.615	1	0.627	389	0.627	389	2	1.966	615	0.525	615	2	1.3	1112	0.354	2224	0	0
10	2011	kub	mg	n	c	6.674	6	6.674	408	1.094	816	NA	NA	NA	NA	NA	NA	NA	NA	NA	NA	0	0
10	2011	woo	dp	n	nc	3.854	NA	NA	NA	NA	NA	6	3.032	450	0.244	450	1	0.738	750	0.738	750	0	0
10	2011	woo	dp	n	c	7.63	1	0.501	295	0.501	295	15	5.049	420	0.095	420	6	2.015	1054	0.566	1054	1.692	5
10	2011	kub	dp	y	c	7.419	3	2.839	515	0.322	1030	10	3.6	315	0.128	315	6	0.9	NA	NA	NA	0.9	6
10	2011	woo	dp	n	c	7.74	4	2.246	315	0.225	315	7	3.433	480	0.129	480	6	2.055	1400	0.369	1400	1.569	3
10	2011	kub	dp	n	nc	4.975	3	1.359	320	0.187	320	3	0.698	270	0.089	270	8	1.356	NA	NA	NA	1.356	8
10	2011	jac	dp	n	nc	12.089	4	4.152	380	0.322	380	4	2.906	350	0.366	350	2	0.269	NA	NA	NA	0.269	2
10	2011	woo	dp	n	c	5.883	4	3.577	315	0.237	315	6	2.313	258	0.212	258	NA	NA	NA	NA	NA	0	0
10	2011	kub	mg	n	nc	3.978	NA	NA	NA	NA	NA	9	2.789	350	0.277	350	2	1.231	1330	0.606	1330	0	0
10	2011	kub	mg	n	c	7.208	4	4.176	320	0.363	320	0	0	NA	NA	NA	3	0.572	NA	NA	NA	0.572	3
10	2011	kub	rp	n	c	4.572	3	4.572	365	1.026	365	NA	NA	NA	NA	NA	NA	NA	NA	NA	NA	0	0
11	2011	kub	dp	n	c	3.393	2	1.507	477	0.428	477	3	1.847	330	0.18	330	NA	NA	NA	NA	NA	0	0
11	2011	kub	dp	n	c	4.697	4	2.65	505	0.361	1010	3	1.354	350	0.265	350	1	0.694	1033	0.694	1033	0	0
11	2011	uta	dp	n	nc	4.587	NA	NA	NA	NA	NA	11	2.803	290	0.138	290	8	1.676	980	0.527	980	0.716	6
11	2011	uta	dp	n	nc	3.27	2	0.729	500	0.284	500	4	2.201	720	0.255	720	NA	NA	NA	NA	NA	0	0
11	2011	kub	rp	y	c	4.337	2	1.969	330	0.767	330	3	1.111	250	0.129	250	7	0.694	NA	NA	NA	0.694	7
11	2011	kub	rp	n	c	4.778	4	3.206	308	0.59	308	2	1.507	390	0.293	390	NA	NA	NA	NA	NA	0	0
11	2011	kub	rp	n	nc	2.666	NA	NA	NA	NA	NA	4	1.884	590	0.196	590	1	0.759	1370	0.759	2740	0	0
11	2011	kub	dp	n	nc	5.224	3	1.16	520	0.383	520	8	2.222	340	0.192	340	2	1.834	1430	1.112	1430	0	0
11	2011	kub	dp	n	nc	5.315	2	1.291	355	0.208	355	7	2.582	378	0.152	378	2	1.637	1250	0.691	1250	0	0
11	2011	kub	dp	n	nc	7.69	1	0.753	430	0.753	860	7	4.565	320	0.18	320	12	2.362	NA	NA	NA	2.362	12
11	2011	kub	dp	n	c	5.151	5	5.151	380	0.332	760	NA	NA	NA	NA	NA	NA	NA	NA	NA	NA	0	0
11	2011	kub	dp	n	nc	3.74	NA	NA	NA	NA	NA	5	2.873	470	0.249	470	1	0.797	1360	0.797	2720	0	0
11	2011	jac	rp	n	c	8.38	7	4.653	360	0.579	720	6	3.411	615	0.177	615	1	0.295	1220	0.295	3660	0	0
11	2011	kub	mg	n	nc	3.629	NA	NA	NA	NA	NA	6	1.597	315	0.14	315	10	1.979	1576	0.795	1576	0.778	8
11	2011	uta	dp	n	nc	3.59	NA	NA	NA	NA	NA	3	0.586	305	0.102	305	25	2.994	760	0.223	760	2.994	22
11	2011	kub	dp	n	c	8.211	2	1.293	360	0.347	360	14	4.381	308	0.174	308	4	0.854	NA	NA	NA	0.854	4
11	2011	uta	dp	n	c	4.441	0	0	NA	NA	NA	12	3.233	310	0.115	310	7	1.198	NA	NA	NA	1.198	7
1	2012	rom	dp	n	nc	4.706	1	0.235	NA	0.235	NA	5	1.837	315	0.124	315	10	2.253	754	0.521	754	1.303	9
1	2012	kub	dp	n	nc	7.546	NA	NA	NA	NA	NA	13	3.8	365	0.14	365	12	3.259	1200	0.841	2550	3.259	10
1	2012	kub	dp	n	nc	4.651	NA	NA	NA	NA	NA	8	3.043	350	0.147	350	7	1.584	955	0.234	955	0.551	5
1	2012	kub	rp	y	c	8.793	4	1.795	485	0.525	970	6	2.212	335	0.21	335	16	4.359	1410	0.872	1410	2.109	10
1	2012	kub	mg	y	c	9.205	3	3.121	530	0.364	530	11	2.7	350	0.123	350	12	3.173	1680	0.778	1680	1.55	9
1	2012	kub	rp	n	nc	6.368	2	1.124	420	0.269	420	12	3.751	345	0.123	345	7	1.217	1550	0.667	1550	0.775	6
1	2012	kub	dp	y	c	9.874	5	3.354	380	0.582	380	11	4.127	340	0.181	340	8	1.795	1670	0.339	1670	0.486	5
1	2012	kub	dp	n	nc	4.246	NA	NA	NA	NA	NA	11	3.418	320	0.138	320	3	0.244	NA	NA	NA	0.244	3
1	2012	kub	dp	n	nc	4.293	NA	NA	NA	NA	NA	14	3.244	308	0.128	308	5	0.987	650	0.326	650	0.662	6
1	2012	rom	dp	n	nc	3.193	NA	NA	NA	NA	NA	7	2.251	300	0.109	300	8	0.851	NA	NA	NA	1.356	8
1	2012	rom	dp	y	c	25.777	13	18.974	315	0.349	315	10	3.9	290	0.11	290	9	2.556	NA	NA	NA	2.556	9
1	2012	rom	rp	n	c	5.996	14	5.996	315	0.108	315	0	0	NA	NA	NA	0	0	NA	NA	NA	0	0
1	2012	rom	dp	n	c	6.78	4	1.394	320	0.166	320	3	1.151	230	0.039	230	7	3.898	NA	NA	NA	3.898	7
1	2012	jac	mg	n	c	12.173	7	7.073	302	0.145	302	5	1.849	256	0.069	256	9	2.507	NA	NA	NA	4.413	12
1	2012	rom	dp	n	c	7.162	4	2.297	280	0.56	280	9	4.068	315	0.125	315	5	1.126	NA	NA	NA	1.126	5
2	2012	woo	dp	n	c	5.21	4	3.082	395	0.256	395	7	2.167	305	0.078	305	NA	NA	NA	NA	NA	0	0
2	2012	woo	dp	n	c	3.637	5	3.637	485	0.432	1500	0	0	NA	NA	NA	0	0	NA	NA	NA	0	0
2	2012	kub	dp	n	c	5.536	3	2.418	515	0.287	515	10	3.09	350	0.144	350	0	0	NA	NA	NA	0	0
2	2012	kub	dp	n	nc	3.631	NA	NA	NA	NA	NA	4	2.489	550	0.253	550	1	0.779	1300	0.779	2600	0	0
2	2012	kub	mg	n	c	6.667	2	1.491	340	0.673	680	4	2.964	505	0.301	1010	2	2.014	1200	0.866	2400	0	0
2	2012	kub	dp	n	nc	8.971	2	1.65	460	0.571	920	14	4.099	300	0.139	300	17	2.8	1380	0.31	1380	1.769	13
2	2012	kub	rp	y	c	9.876	4	3.97	520	0.355	520	13	3.189	315	0.128	315	11	2.499	1400	0.295	1400	1.105	8
2	2012	kub	dp	n	nc	5.377	1	0.291	460	0.291	920	12	3.434	320	0.132	320	9	1.554	NA	NA	NA	1.554	9
2	2012	kub	rp	n	c	6.539	4	3.819	485	0.46	970	0	0	NA	NA	NA	2	1.636	1200	0.651	1200	0	0
2	2012	jac	rp	n	c	9.768	2	2.101	350	0.834	350	15	7.641	455	0.302	910	0	0	NA	NA	NA	0	0
2	2012	kub	dp	n	c	7.947	4	4.323	420	0.78	420	4	3.514	520	0.392	520	0	0	NA	NA	NA	0	0
2	2012	woo	mg	n	c	7.559	3	2.736	400	0.473	400	4	2.849	420	0.242	420	2	1.881	700	0.715	700	0	0
2	2012	jac	mg	n	c	13.345	3	4.589	390	0.704	780	10	6.024	550	0.306	550	5	2.114	1500	0.342	1500	0	0
2	2012	woo	dp	y	c	11.084	3	2.489	303	0.311	303	14	4.075	400	0.08	400	21	4.528	950	0.29	950	4.528	19
2	2012	woo	mg	n	nc	5.696	2	1.513	415	0.498	415	5	3.476	420	0.367	1680	1	0.682	490	0.682	980	0	0
2	2012	rom	rp	n	c	8.729	4	3.465	315	0.553	315	7	3.363	330	0.141	330	4	1.93	NA	NA	NA	1.93	4
2	2012	woo	rp	n	nc	6.462	4	2.06	420	0.182	420	7	2.257	325	0.168	325	3	2.125	890	0.575	890	0	0
2	2012	rom	mg	n	c	7.333	5	4.26	535	0.426	535	4	1.643	310	0.105	310	1	0.624	740	0.624	740	0	0
2	2012	jac	mg	n	nc	8.001	2	1.598	355	0.492	355	9	6.344	620	0.161	620	NA	NA	NA	NA	NA	0	0
2	2012	jac	dp	n	nc	4.642	NA	NA	NA	NA	NA	8	2.722	325	0.176	325	3	1.934	1285	0.468	1285	0	0
3	2012	kub	dp	n	c	6.641	3	2.63	460	0.391	460	8	2.248	350	0.128	350	2	1.72	700	0.599	700	0	0
3	2012	kub	dp	n	nc	5.327	1	0.547	405	0.547	405	14	4.739	330	0.115	330	NA	NA	NA	NA	NA	0	0
3	2012	kub	dp	n	c	6.434	3	2.398	435	0.264	435	12	3.54	330	0.153	330	5	0.503	NA	NA	NA	0.503	5
3	2012	kub	dp	n	c	6.129	2	1.592	410	0.347	410	10	3.79	350	0.178	350	1	0.725	1200	0.725	1200	0	0
3	2012	kub	dp	n	c	8.144	4	3.383	390	0.595	390	6	1.947	260	0.155	260	5	1.203	NA	NA	NA	1.203	5
3	2012	kub	dp	n	c	9.782	3	2.985	390	0.461	390	13	4.24	300	0.135	300	7	1.916	NA	NA	NA	1.916	7
3	2012	kub	dp	n	c	6.208	3	1.873	385	0.434	385	11	3.412	310	0.149	310	1	0.839	1380	0.839	1380	0	0
3	2012	kub	rp	y	c	10.465	5	3.268	355	0.634	355	14	4.992	295	0.151	295	6	1.678	1375	0.63	1375	0.46	5
4	2012	rom	rp	n	nc	3.405	NA	NA	NA	NA	NA	4	1.763	585	0.113	585	2	1.614	1100	0.534	2200	0	0
4	2012	rom	rp	n	nc	4.133	NA	NA	NA	NA	NA	4	2.344	580	0.306	580	2	1.774	1105	0.73	3315	0	0
4	2012	rom	dp	n	c	8.755	4	3.511	300	0.252	300	7	2.73	320	0.142	320	8	2.304	NA	NA	NA	2.304	8
4	2012	rom	rp	n	nc	3.782	1	0.419	410	0.419	410	4	2.348	350	0.107	350	1	0.787	1050	0.787	1050	0	0
4	2012	rom	rp	n	c	8.48	5	3.37	300	0.399	300	10	5.144	340	0.099	340	NA	NA	NA	NA	NA	0	0
4	2012	rom	dp	n	nc	6.225	NA	NA	NA	NA	NA	8	3.219	330	0.161	330	16	2.56	NA	NA	NA	2.56	16
4	2012	rom	dp	n	c	8.694	4	2.273	295	0.568	295	9	4.012	330	0.123	330	10	2.273	750	0.411	750	1.046	7
4	2012	rom	mg	n	c	6.68	4	3.017	360	0.398	360	7	2.702	310	0.078	310	4	0.383	NA	NA	NA	0.383	4
4	2012	rom	rp	n	c	7.183	4	2.853	300	0.387	300	3	2.567	400	0.479	800	2	1.693	1035	0.682	1035	0	0
4	2012	rom	dp	n	nc	4.731	NA	NA	NA	NA	NA	11	3.704	315	0.157	315	3	0.307	NA	NA	NA	0.307	3
4	2012	rom	dp	n	nc	7.156	1	0.517	310	0.517	310	8	3.786	330	0.117	330	16	2.19	1220	0.394	1220	2.19	14
4	2012	rom	dp	n	nc	6.047	NA	NA	NA	NA	NA	6	2.918	335	0.154	335	12	2.612	1120	0.346	1120	2.011	9
4	2012	rom	rp	n	c	6.143	5	3.699	590	0.457	590	1	0.763	500	0.211	500	2	1.5	565	0.316	565	0	0
4	2012	rom	dp	y	c	8.932	9	5.485	570	0.471	1140	6	1.602	320	0.101	320	7	1.723	1220	0.661	1220	0.694	5
4	2012	rom	rp	y	c	9.846	6	5.812	540	0.46	540	4	1.685	325	0.086	325	4	2.008	720	0.393	720	0.427	3
4	2012	rom	mg	n	c	8.436	8	6.301	470	0.416	470	0	0.407	NA	NA	NA	2	1.479	880	0.632	880	0	0
4	2012	rom	rp	n	c	6.749	4	2.374	300	0.361	300	7	2.992	320	0.12	320	7	1.288	NA	NA	NA	1.288	7
4	2012	kub	dp	n	c	5.805	1	0.716	320	0.716	320	10	4.07	370	0.149	370	3	0.221	NA	NA	NA	0.221	3
4	2012	kub	mg	n	c	5.497	3	2.293	340	0.799	340	3	3.164	435	0.316	435	NA	NA	NA	NA	NA	0	0
4	2012	woo	dp	y	c	10.065	3	2.081	475	0.42	950	19	5.603	250	0.136	250	12	2.316	1575	0.523	1575	1.243	9
4	2012	woo	rp	y	c	13.092	3	2.937	400	0.515	400	16	5.724	250	0.116	250	18	4.217	970	0.25	970	1.389	9
4	2012	woo	dp	n	c	8.622	3	1.911	320	0.326	320	17	5.148	240	0.151	240	9	1.466	NA	NA	NA	1.466	9
4	2012	rom	dp	n	c	7.066	2	1.361	300	0.441	300	5	4.376	305	0.151	305	7	1.114	NA	NA	NA	1.114	7
4	2012	rom	mg	n	c	6.826	5	3.265	330	0.326	330	5	2.916	340	0.136	340	1	0.536	900	0.536	900	0	0
4	2012	kub	mg	n	c	7.664	7	5.543	450	0.308	450	4	0.856	330	0.079	330	2	1.043	860	0.381	860	0	0
4	2012	kub	rp	n	c	6.473	3	1.1	480	0.397	960	11	3.146	380	0.093	380	3	2.216	1490	0.521	1490	0	0
4	2012	jac	rp	n	c	3.93	3	1.2	415	0.145	415	6	1.38	330	0.108	330	3	1.286	1295	0.218	2590	0	0
4	2012	kub	dp	n	nc	6.73	2	0.93	390	0.206	390	14	4.09	345	0.135	345	8	1.57	1425	0.588	1425	1.57	7
4	2012	kub	dp	n	c	8.156	2	1.53	400	0.303	400	13	4.433	360	0.129	360	8	1.861	1385	0.566	1385	1.002	6
4	2012	rom	dp	n	nc	6.558	1	0.267	280	0.267	280	10	5.324	320	0.09	320	6	0.882	NA	NA	NA	0.882	6
4	2012	woo	dp	n	nc	5.906	NA	NA	NA	NA	NA	11	4.156	450	0.164	450	2	1.75	1570	0.829	1570	0	0
4	2012	rom	mg	n	nc	7.014	6	7.014	480	0.557	480	NA	NA	NA	NA	NA	NA	NA	NA	NA	NA	NA	NA
4	2012	kub	mg	n	nc	5.041	1	0.495	360	0.495	720	7	2.847	550	0.187	550	2	1.586	1380	0.691	1380	0	0
4	2012	kub	dp	n	nc	3.838	NA	NA	NA	NA	NA	13	3.488	385	0.114	385	4	0.264	NA	NA	NA	0.264	4
4	2012	rom	rp	n	c	5.424	2	1.55	305	0.418	305	2	1.493	420	0.403	420	3	2.159	910	0.587	910	0	0
5	2012	kub	mg	n	nc	5.874	NA	NA	NA	NA	NA	13	4.181	280	0.105	280	7	1.633	1250	0.418	1250	0.847	6
5	2012	rom	rp	y	nc	7.723	7	3.612	405	0.388	405	0	1.596	NA	NA	NA	8	1.356	NA	NA	NA	1.356	8
5	2012	rom	dp	y	c	9.713	8	5.897	340	0.259	340	4	2.367	250	0.058	250	7	1.224	NA	NA	NA	1.224	7
5	2012	rom	mg	n	c	5.928	5	4.629	530	0.55	1060	0	0	NA	NA	NA	2	0.955	800	0.192	800	0	0
5	2012	rom	mg	n	c	5.767	5	3.962	515	0.607	515	0	0	NA	NA	NA	2	1.451	515	0.571	1030	0	0
5	2012	rom	mg	n	c	5.812	3	2.196	465	0.518	930	3	1.583	530	0.276	530	2	1.706	1020	0.738	4080	0	0
5	2012	rom	dp	n	nc	7.073	3	1.933	350	0.175	350	5	2.303	335	0.106	335	8	2.767	1290	0.43	1290	1.91	5
5	2012	rom	dp	y	c	11.593	11	6.483	460	0.317	920	9	3.171	330	0.135	330	5	1.635	1370	0.637	1370	0.761	4
5	2012	jac	dp	n	nc	7.63	NA	NA	NA	NA	NA	11	4.736	310	0.147	310	7	2.933	1350	0.586	1350	1.015	5
5	2012	rom	dp	y	c	5.83	4	3.623	365	0.231	365	1	1.342	280	0.112	280	6	0.766	NA	NA	NA	0.766	6
5	2012	rom	mg	n	c	7.033	5	4.235	375	0.663	375	0	0	NA	NA	NA	4	2.547	490	0.541	980	0	0
5	2012	jac	dp	n	nc	5.99	1	0.597	320	0.292	320	12	4.471	345	0.17	345	5	0.674	NA	NA	NA	0.674	5
5	2012	jac	dp	n	nc	7.047	2	1.004	260	0.149	260	11	4.095	350	0.148	350	6	1.506	515	0.31	1030	2.571	9
5	2012	jac	dp	n	c	8.6	2	2.813	335	0.721	335	12	5.302	315	0.149	315	3	0.418	NA	NA	NA	0.418	3
5	2012	jac	dp	n	nc	5.724	NA	NA	NA	NA	NA	11	5.1	285	0.179	285	4	0.615	NA	NA	NA	0.615	4
5	2012	jac	dp	n	nc	4.662	NA	NA	NA	NA	NA	8	2.247	300	0.134	300	3	2.259	1380	0.702	1380	0	0
5	2012	jac	rp	n	nc	6.725	NA	NA	NA	NA	NA	8	3.106	320	0.157	320	2	1.266	480	0.32	960	0	0
5	2012	jac	rp	n	c	9.395	2	2.069	355	0.609	355	12	4.831	330	0.136	330	3	2.521	1590	0.709	1590	0	0
5	2012	jac	dp	n	nc	7.027	NA	NA	NA	NA	NA	7	3.838	500	0.251	500	3	3.176	1620	1.101	1620	0	0
5	2012	jac	mg	n	c	13.023	9	5.838	490	0.569	980	16	6.587	330	0.158	330	3	0.418	NA	NA	NA	0.418	3
5	2012	jac	dp	n	nc	6.039	2	1.543	330	0.593	330	15	3.56	305	0.128	305	5	0.852	NA	NA	NA	2.39	10
5	2012	jac	mg	n	c	8.642	7	4.172	350	0.397	350	10	3.749	290	0.113	290	3	0.696	NA	NA	NA	0.696	3
5	2012	kub	dp	n	c	8.908	2	1.612	515	0.385	1030	11	3.937	360	0.112	360	12	3.267	1740	0.508	1700	3.267	10
5	2012	kub	rp	n	nc	5.864	2	1.187	510	0.195	510	10	2.608	375	0.143	375	5	1.582	465	0.284	930	1.582	4
5	2012	kub	dp	n	c	8.903	3	1.98	495	0.388	990	12	4.315	360	0.157	360	8	2.268	1355	0.658	2710	2.268	7
5	2012	kub	rp	n	c	8.582	3	2.949	480	0.298	480	5	2.248	280	0.131	280	15	3.342	NA	NA	NA	3.342	15
5	2012	kub	rp	y	c	8.798	5	3.828	530	0.387	1060	9	3.02	355	0.131	355	7	1.925	1580	0.915	3160	0.793	6
5	2012	kub	dp	n	nc	4.953	NA	NA	NA	NA	NA	9	2.641	320	0.148	320	7	2.275	710	0.459	710	0.863	5
5	2012	kub	dp	n	nc	4.54	NA	NA	NA	NA	NA	6	2.182	320	0.159	320	13	2.296	1100	0.576	1100	2.296	12
5	2012	kub	dp	n	c	4.46	2	1.213	310	0.316	310	8	3.217	315	0.195	315	NA	NA	NA	NA	NA	0	0
5	2012	kub	mg	n	c	6.047	3	2.529	465	0.302	465	4	2.494	560	0.189	560	1	0.908	1200	0.908	6000	0	0
5	2012	rom	rp	y	c	8.912	6	3.551	290	0.466	290	9	4.395	325	0.092	325	9	0.928	NA	NA	NA	0.928	9
5	2012	rom	rp	y	c	9.249	7	4.57	440	0.354	880	4	2.171	350	0.159	350	11	2.412	1215	0.452	1215	0.804	7
5	2012	rom	mg	n	c	7.718	9	7.718	540	0.404	540	NA	NA	NA	NA	NA	NA	NA	NA	NA	NA	NA	NA
5	2012	rom	dp	n	c	7.821	7	3.521	390	0.275	390	6	2.379	350	0.154	350	14	1.864	NA	NA	NA	1.864	14
5	2012	rom	dp	n	c	7.592	6	3.647	390	0.34	390	7	3.247	320	0.117	320	3	0.336	NA	NA	NA	0.336	3
5	2012	rom	dp	n	nc	5.463	NA	NA	NA	NA	NA	6	3.619	325	0.151	325	5	1.173	730	0.38	730	0.313	4
5	2012	rom	mg	n	c	6.625	6	5.178	620	0.397	620	NA	NA	NA	NA	NA	2	1.127	1025	0.47	1025	0	0
5	2012	kub	dp	n	c	6.86	6	3.125	460	0.161	460	6	1.72	360	0.168	360	2	1.946	600	0.582	600	0	0
5	2012	kub	dp	n	c	6.575	3	1.855	430	0.352	430	9	3.049	370	0.133	370	6	1.478	1425	0.603	1425	0.582	5
