# Supplementary material for: Re-emergence of the leaf clip gesture during an alpha takeover affects variation in male chimpanzee loud calls
Source: PeerJ. 2018 Jun 28;6:e5079. doi: 10.7717/peerj.5079 (PMC6026532; doi:10.7717/peerj.5079)
Supplement: Data S2 [file peerj-06-5079-s005.xlsx]

## Sheet: focaldata
period	day	month	year	focal.id	hours.focaled	total.phsmtb	total.agg	focal.lc.yn
before	15	7	2011	kub	11	6	0	n
before	16	7	2011	kub	3	7	0	n
before	26	7	2011	woo	10.5	0	1	n
before	27	7	2011	uta	10.5	1	2	n
before	12	8	2011	woo	12	6	0	n
before	13	8	2011	woo	5	3	0	n
before	14	8	2011	uta	11	1	0	n
before	16	8	2011	woo	11	3	1	n
before	17	8	2011	kub	11	1	0	n
before	19	8	2011	kub	11.5	6	0	n
before	21	8	2011	kub	11	4	0	n
before	23	8	2011	woo	11.5	8	0	n
before	26	8	2011	woo	12	12	3	n
before	27	8	2011	kub	9	4	0	n
before	28	8	2011	woo	10	9	2	n
before	29	8	2011	uta	5	4	0	n
before	30	8	2011	kub	11	4	0	n
before	31	8	2011	woo	11.5	7	2	n
before	18	9	2011	uta	11	9	1	n
before	19	9	2011	uta	11	5	1	n
before	21	9	2011	kub	11	5	1	n
before	22	9	2011	woo	12	8	7	n
before	23	9	2011	kub	11	14	0	n
before	24	9	2011	woo	3.5	5	2	n
during	17	10	2011	kub	11.5	24	6	y
during	18	10	2011	woo	3	1	2	n
during	19	10	2011	woo	11	3	1	n
during	22	10	2011	uta	11.5	30	21	n
during	23	10	2011	woo	11.5	24	4	y
during	26	10	2011	jac	11.5	16	3	n
during	17	11	2011	kub	5	12	0	n
during	19	11	2011	kub	11	17	7	y
after	20	11	2011	rom	6	8	0	n
after	21	11	2011	jac	12	13	2	n
after	24	11	2011	woo	12	2	2	n
after	25	11	2011	uta	11.5	9	5	n
after	15	12	2011	woo	9	5	5	n
after	16	12	2011	uta	12	5	4	n
after	17	12	2011	kub	12.5	17	11	n
after	18	12	2011	rom	12	13	2	n
after	19	12	2011	jac	11.5	6	2	n
after	13	1	2012	kub	9.5	8	2	n
after	16	1	2012	woo	12	3	1	n
after	17	1	2012	kub	11	17	0	y
after	18	1	2012	rom	8	7	1	y
after	22	1	2012	woo	11	4	0	n
after	24	1	2012	woo	11	7	0	n
after	10	2	2012	woo	11	6	0	n
after	11	2	2012	kub	11	21	7	y
after	16	2	2012	woo	8	3	1	y
after	23	2	2012	rom	7.5	13	0	n
after	6	3	2012	jac	5	5	4	n
after	23	3	2012	kub	11.5	14	5	n
after	27	3	2012	kub	7	4	4	n
after	29	3	2012	woo	5.5	1	1	y
after	10	4	2012	rom	10	29	3	y
after	11	4	2012	jac	6	1	4	n
after	12	4	2012	woo	9	15	0	y
after	17	4	2012	kub	11	12	4	y
after	20	4	2012	woo	5.5	2	0	n
after	24	4	2012	rom	7.5	9	1	n
after	6	5	2012	woo	12	7	3	n
after	11	5	2012	rom	11	25	1	y
after	12	5	2012	jac	10.5	34	6	n
after	16	5	2012	kub	12	26	7	y
after	17	5	2012	woo	8	4	0	y
after	20	5	2012	rom	12	17	0	y
after	22	5	2012	kub	11	12	2	n
